# Supplementary material for: Is plasma amyloid-β 1–42/1–40 a better biomarker for Alzheimer’s disease than AβX–42/X–40?
Source: PubMed Central journal article supplement (PMC9719149; doi:10.1186/s12987-022-00390-4), 2022-12-03
Supplement: 12987_2022_390_MOESM1_ESM.pdf [file 12987_2022_390_MOESM1_ESM.pdf]

## Supplementary material

### Is Plasma Amyloid- $\beta$ 1–42/1-40 a Better Biomarker for Alzheimer’s Disease than A $\beta$ X–42/X–40?

Hans-Wolfgang Klafki<sup>a</sup>, Barbara Morgado<sup>a</sup>, Oliver Wirths<sup>a</sup>, Olaf Jahn<sup>a, b</sup>,  
Chris Bauer<sup>c</sup>, Hermann Esselmann<sup>a</sup>, Johannes Schuchhardt<sup>c</sup>, Jens  
Wiltfang<sup>a, d, e</sup>

<sup>a</sup>Department of Psychiatry and Psychotherapy, University Medical Center  
Goettingen, Georg-August-University, Goettingen, Germany

<sup>b</sup>Neuroproteomics Group, Department of Molecular Neurobiology, Max Planck  
Institute for Multidisciplinary Sciences, Goettingen, Germany

<sup>c</sup>MicroDiscovery GmbH, Marienburger Strasse 1, D-10405 Berlin, Germany

<sup>d</sup>German Center for Neurodegenerative Diseases (DZNE), Goettingen, Germany

<sup>e</sup>Neurosciences and Signaling Group, Institute of Biomedicine (iBiMED),  
Department of Medical Sciences, University of Aveiro, Aveiro, Portugal

*\*Correspondence to Hans-W. Klafki, Dept. of Psychiatry and Psychotherapy,  
University Medical Center Goettingen, Georg-August-University, Von-Siebold-  
Str. 5, D37075 Goettingen, Germany; e-mail: hans.klafki@med.uni-  
goettingen.de, tel.: +49 5513965797*

#### Content:

**Additional file 1: Figure S1.** Analysis of correlations between A $\beta$  measures in cerebrospinal fluid and eluates obtained after immunoprecipitation from EDTA-blood plasma.

**Additional file 1: Figure S2.** Hypothetical model to explain the observed enhancement of the differences between amyloid-positive and amyloid-negative patients in plasma A $\beta$ 42/40 by measuring exclusively plasma A $\beta$ 1–42 and A $\beta$ 1–40.

**Additional file 1: Table S1.** Comparison of group differences: Plasma A $\beta$ X–42/X–40 vs. A $\beta$ 1–42/A $\beta$ 1–40.

**Additional file 1: Table S2.** Classification statistics for detection of amyloid-positivity for plasma A $\beta$ 1–42/1–40 and A $\beta$ X–42/X–40.



**Additional file 1: Figure S2. Hypothetical model to explain the observed enhancement of the differences between amyloid-positive and amyloid-negative patients in plasma A $\beta$ 42/40 by measuring exclusively plasma A $\beta$ 1–42 and A $\beta$ 1–40.**

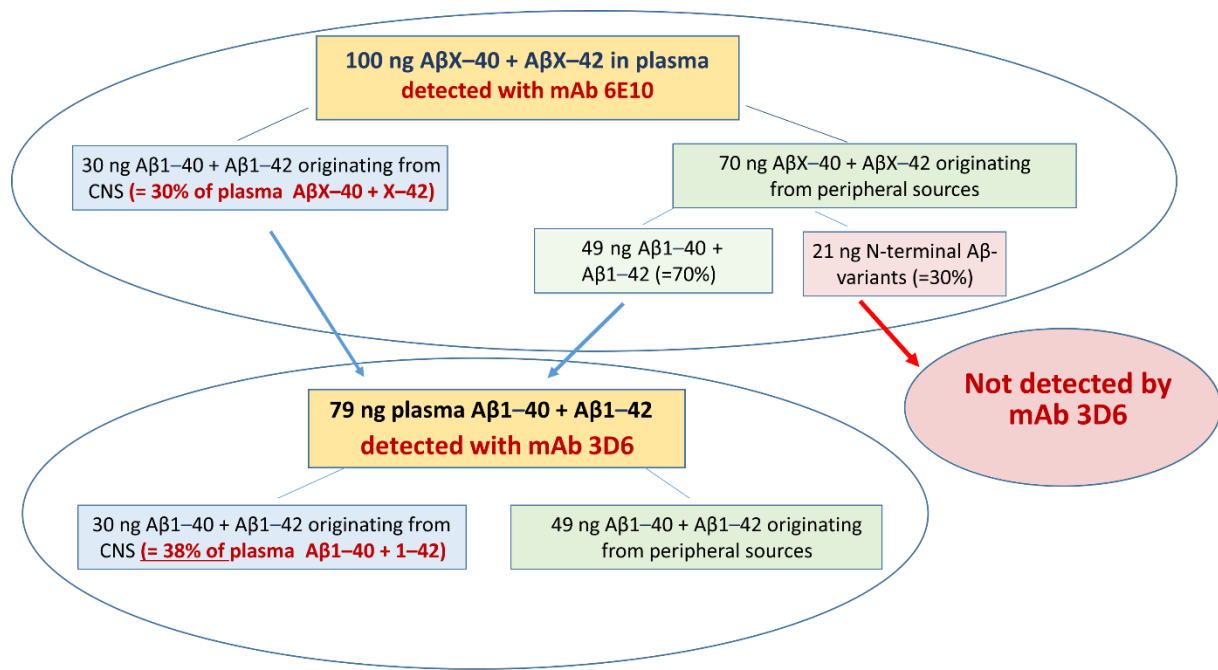

**Additional file 1: Figure S2:** Hypothetical model to explain the observed enhancement of the differences between amyloid-positive and amyloid-negative patients in plasma A $\beta$ 42/40 by measuring exclusively plasma A $\beta$ 1–42 and A $\beta$ 1–40. According to our model, the molecular mechanisms causing the selective, approximately 50% reduction in CSF A $\beta$ 42/40 in the presence of brain amyloid (Keshavan, Wellington et al. 2021) are restricted to the CNS. We assume that approximately 30% (in this example 30 ng of a measured total amount of 100 ng) of soluble A $\beta$  in blood plasma originates from the central nervous system (CNS), most of which starting with Asp(1). Of the remaining plasma A $\beta$  originating from peripheral sources, approximately 30% is estimated to have a different N-terminus. The monoclonal antibody (mAb) 6E10 detects several aminoterminal A $\beta$  variants (i.e. A $\beta$ X–40 and A $\beta$ X–42). The measurable decrease in plasma A $\beta$ 42/40 in amyloid-positive patients is proportional to the fraction of plasma A $\beta$  in the assay that originates from the CNS. Measuring exclusively A $\beta$ 1–40 and A $\beta$ 1–42 (instead of A $\beta$ X–40 and A $\beta$ X–42) by employing mAb 3D6 will increase the relative fraction of A $\beta$  originating from CNS from 30% (when measured with mAb 6E10) to 38% because A $\beta$  peptides with other N-termini than Asp(1) are excluded from the measurements with mAb 3D6. In consequence, the measurable decrease in plasma A $\beta$ 1–42/1–40 in amyloid-positive subjects is expected to be larger than that of A $\beta$ X–42/X–40. The assumed 50% reduction in CSF A $\beta$ 42/40

in the presence of brain amyloid is expected to be mirrored in plasma by a 15% (0.3 x 50%) reduction in A $\beta$ X-42/X-40 but 19% decrease (0.38 x 50%) in A $\beta$ 1-42/1-40.

**Reference:**

Keshavan, A., H. Wellington, Z. Chen, A. Khatun, M. Chapman, M. Hart, D. M. Cash, W. Coath, T. D. Parker, S. M. Buchanan, S. E. Keuss, M. J. Harris, H. Murray-Smith, A. Heslegrave, N. C. Fox, H. Zetterberg and J. M. Schott (2021). "Concordance of CSF measures of Alzheimer's pathology with amyloid PET status in a preclinical cohort: A comparison of Lumipulse and established immunoassays." *Alzheimers Dement (Amst)* **13**(1): e12131.

**Additional file 1: Table S1. Comparison of group differences: Plasma A $\beta$ X-42/X-40 vs. A $\beta$ 1-42/A $\beta$ 1-40.**

| Variable                   | Median difference (%) <sup>1</sup> | Mean difference (%) <sup>2</sup> | Cohen's d <sup>3</sup> |
|----------------------------|------------------------------------|----------------------------------|------------------------|
| Plasma A $\beta$ X-42/X-40 | -15.56                             | -15.50                           | 1.48                   |
| Plasma A $\beta$ 1-42/1-40 | -20.86                             | -18.34                           | 1.73                   |

<sup>1</sup> The relative median difference between amyloid-positive (A $\beta$ +) and amyloid negative (A $\beta$ -) groups was calculated as:

$$\text{Median difference (\%)} = 100 * \frac{\text{median (A}\beta\text{ +)} - \text{median (A}\beta\text{-)}}{\text{median(A}\beta\text{-)}}$$

<sup>2</sup> The relative mean difference between amyloid-positive (A $\beta$ +) and amyloid-negative (A $\beta$ -) groups was calculated as:

$$\text{Mean difference (\%)} = 100 * \frac{\text{mean (A}\beta\text{ +)} - \text{mean (A}\beta\text{-)}}{\text{mean(A}\beta\text{-)}}$$

<sup>3</sup> Cohen's d was calculated with R package "effsize" (version 0.8.1).

A $\beta$ , amyloid- $\beta$ .

**Additional file 1: Table S2. Classification statistics for detection of amyloid-positivity<sup>1</sup> for plasma A $\beta$ 1–42/1–40 and A $\beta$ X–42/X–40.**

|                                | Plasma A $\beta$ 1–42/1–40 | Plasma A $\beta$ X–42/X–40 |
|--------------------------------|----------------------------|----------------------------|
| True positive                  | 31                         | 32                         |
| True negative                  | 32                         | 31                         |
| False positive                 | 5                          | 6                          |
| False negative                 | 5                          | 4                          |
| Positive predictive value      | 0.861                      | 0.842                      |
| Negative predictive value      | 0.865                      | 0.886                      |
| Sensitivity                    | 0.861                      | 0.889                      |
| Specificity                    | 0.865                      | 0.838                      |
| Accuracy                       | 0.863                      | 0.863                      |
| Area under the ROC curve (AUC) | 0.884                      | 0.875                      |

Receiver operating characteristic (ROC) curves were evaluated at the maximum Youden point.

<sup>1</sup> The study participants were categorized according to the CSF A $\beta$ X–42/A $\beta$ X–40 ratio. Amyloid- $\beta$ -positive (A $\beta$ <sup>+</sup>): CSF A $\beta$ X–42/X–40  $\leq$  0.058; amyloid- $\beta$ -negative (A $\beta$ <sup>–</sup>): CSF A $\beta$ X–42/X–40  $>$  0.058

A $\beta$ , amyloid- $\beta$ .
